# Supplementary material
Source: PubMed Central journal article supplement (PMC4624467)
Supplement: NIHMS721116-supplement-Supplemental_Tables.pdf [file NIHMS721116-supplement-Supplemental_Tables.pdf]

**SUPPLEMENTAL MATERIAL**

**Supplemental Tables, Obesity insulin resistance and small vessel disease on MRI: the Atherosclerosis Risk in Communities Study**

**Supplemental Table I. Factor loadings for Obesity and insulin resistance (IR) score \***

|                          | Obesity and<br>insulin<br>resistance score |
|--------------------------|--------------------------------------------|
| Waist circumference      | <b>0.42</b>                                |
| Log HOMA-IR              | <b>0.42</b>                                |
| Log insulin              | <b>0.40</b>                                |
| BMI                      | <b>0.37</b>                                |
| Waist-to-hip ratio       | <b>0.34</b>                                |
| Systolic blood pressure  | 0.21                                       |
| Glucose                  | 0.21                                       |
| Diastolic blood pressure | 0.20                                       |
| Log Triglycerides        | 0.20                                       |
| LDL                      | 0.11                                       |
| HDL                      | -0.23                                      |
| % Total Variance         | 36.3                                       |
| % Cumulative Variance    | 36.3                                       |

\*Factor loadings represent the correlation between the individual variable and the factor; HOMA-IR= Homeostatic model of insulin resistance; BMI= body mass index; HDL = high density lipoprotein; LDL = low density lipoprotein  
Values are shown after orthogonal rotation

**Supplemental Table II: Unadjusted association of obesity and insulin resistance and incident lacunes**

|                                 | WMH Progression<br>(Q5 v. Q1-4) |            | Incident lacunes<br>3-20mm |            |
|---------------------------------|---------------------------------|------------|----------------------------|------------|
|                                 | OR                              | 95% CI     | OR                         | 95% CI     |
| Insulin*                        | 1.0                             | 0.92, 1.24 | 1.31                       | 0.95, 1.35 |
| HOMA-IR*                        | 1.10                            | 0.95, 1.27 | 1.17                       | 0.99, 1.38 |
| Body mass index (BMI)*          | 1.20                            | 1.02, 1.40 | 1.09                       | 0.89, 1.33 |
| Waist circumference*            | 1.18                            | 1.0, 1.39  | 1.18                       | 0.96, 1.45 |
| Waist-to-hip ratio (WTHR)*      | 1.17                            | 0.99, 1.37 | 1.34                       | 1.08, 1.67 |
| Triglycerides*                  | 0.89                            | 0.74, 1.08 | 1.23                       | 1.05, 1.46 |
| High density lipoprotein (HDL)* | 1.03                            | 0.88, 1.21 | 0.78                       | 0.62, 0.98 |
| Systolic blood pressure (SBP)*  | 1.54                            | 1.32, 1.82 | 1.25                       | 1.02, 1.52 |
| MetS <sup>†</sup> (yes/no)      | 1.20                            | 0.86, 1.67 | 1.86                       | 1.22, 2.82 |
| IR score* <sup>†</sup>          | 1.27                            | 1.08, 1.50 | 1.36                       | 1.10, 1.68 |

Q= quintile; OR = odds ratio; CI = confidence interval; HOMA-IR = Homeostatic model assessment, insulin resistance; \*Odds ratios are for each 1-standard deviation (SD) increase

**Supplemental Table III. Unadjusted association of obesity and insulin resistance and incident lacunes, by size**

|                                 | Incident lacunes 3-7mm |            | Incident lacunes >7-20mm |            |
|---------------------------------|------------------------|------------|--------------------------|------------|
|                                 | OR                     | 95% CI     | OR                       | 95% CI     |
| Insulin*                        | 1.10                   | 0.88, 1.37 | 1.19                     | 0.96, 1.48 |
| HOMA-IR*,                       | 1.15                   | 0.95, 1.41 | 1.24                     | 1.02, 1.52 |
| Body mass index (BMI)*          | 0.95                   | 0.73, 1.23 | 1.30                     | 1.00, 1.69 |
| Waist circumference*            | 1.05                   | 0.81, 1.36 | 1.43                     | 1.08, 1.89 |
| Waist-to-hip ratio (WTHR)*      | 1.32                   | 1.01, 1.73 | 1.50                     | 1.10, 2.05 |
| Triglycerides*                  | 1.36                   | 1.14, 1.63 | 1.20                     | 0.98, 1.47 |
| High density lipoprotein (HDL)* | 0.77                   | 0.58, 1.03 | 0.68                     | 0.48, 0.95 |
| Systolic blood pressure (SBP)*  | 1.16                   | 0.90, 1.48 | 1.42                     | 1.09, 1.85 |
| MetS (yes/no)                   | 1.77                   | 1.05, 2.98 | 3.10                     | 1.68, 5.69 |
| IR score*                       | 1.23                   | 0.94, 1.61 | 1.72                     | 1.27, 2.33 |

OR = odds ratio; CI = confidence interval; HOMA-IR = Homeostatic model assessment, insulin resistance;  
 \*Odds ratios are for each 1 standard deviation (SD) increase

**Supplemental Table IV. Association of obesity and insulin resistance and increase in white matter hyperintensity (WMH) grade**

|                                 | WMH grade increase $\geq 1$ point v. none |            |         |            |
|---------------------------------|-------------------------------------------|------------|---------|------------|
|                                 | Model 1                                   |            | Model 2 |            |
|                                 | OR                                        | 95% CI     | OR      | 95% CI     |
| Insulin *                       | 1.12                                      | 0.98, 1.30 | 1.02    | 0.88, 1.18 |
| HOMA-IR*                        | 1.11                                      | 0.97, 1.29 | 1.02    | 0.88, 1.18 |
| Body mass index (BMI)*          | 1.31                                      | 1.14, 1.50 | 1.14    | 0.97, 1.34 |
| Waist circumference*            | 1.24                                      | 1.08, 1.42 | 1.18    | 1.02, 1.37 |
| Waist-to-hip ratio*             | 1.07                                      | 0.94, 1.22 | 1.08    | 0.93, 1.26 |
| Triglycerides*                  | 0.96                                      | 0.84, 1.09 | 1.00    | 0.87, 1.15 |
| High density lipoprotein (HDL)* | 1.12                                      | 0.98, 1.29 | 1.13    | 0.97, 1.32 |
| Systolic blood pressure (SBP)*  | 1.42                                      | 1.24, 1.65 | 1.26    | 1.09, 1.48 |
| MetS <sup>†</sup> (yes/no)      | 1.19                                      | 0.90, 1.57 | 1.13    | 0.84, 1.51 |
| IR score* <sup>†</sup>          | 1.25                                      | 1.09, 1.43 | 1.16    | 1.00, 1.35 |

OR = odds ratio; CI = confidence interval; HOMA-IR = Homeostatic model assessment, insulin resistance; \*Odds ratios are for each 1-standard deviation increase; Model 1 = unadjusted; Model 2 = adjusted for age, sex, education, race, history of coronary artery disease, history of alcohol use, tobacco use and hypertension; † Model 2 not adjusted for hypertension;

**Supplemental Table V. Association of obesity and insulin resistance with (WMH) progression and incident lacunes, excluding diabetics (n=861)**

|                                 | WMH progression (Q5 v Q1-4, n=152) |            |         |            | Incident lacunes 3-20 mm (n=74) |            |         |            |
|---------------------------------|------------------------------------|------------|---------|------------|---------------------------------|------------|---------|------------|
|                                 | Model 1                            |            | Model 2 |            | Model 1                         |            | Model 2 |            |
|                                 | OR                                 | 95% CI     | OR      | 95% CI     | OR                              | 95% CI     | OR      | 95% CI     |
| Insulin *                       | 1.10                               | 0.93, 1.30 | 0.97    | 0.79, 1.20 | 1.12                            | 0.91, 1.38 | 1.13    | 0.89, 1.43 |
| HOMA-IR*                        | 1.14                               | 0.94, 1.38 | 0.99    | 0.78, 1.26 | 1.15                            | 0.90, 1.45 | 1.16    | 0.89, 1.51 |
| Body mass index (BMI)*          | 1.16                               | 0.98, 1.38 | 0.95    | 0.78, 1.15 | 1.12                            | 0.92, 1.37 | 1.00    | 0.78, 1.29 |
| Waist circumference*            | 1.11                               | 0.94, 1.32 | 0.96    | 0.80, 1.16 | 1.15                            | 0.92, 1.43 | 1.08    | 0.85, 1.37 |
| Waist-to-hip ratio (WTHR)*      | 1.09                               | 0.92, 1.30 | 0.99    | 0.81, 1.21 | 1.32                            | 1.05, 1.58 | 1.25    | 0.97, 1.62 |
| Triglycerides                   | 0.89                               | 0.72, 1.09 | 0.91    | 0.73, 1.14 | 1.20                            | 1.00, 1.43 | 1.19    | 0.99, 1.44 |
| High density lipoprotein (HDL)* | 1.02                               | 0.86, 1.20 | 1.11    | 0.91, 1.37 | 0.78                            | 0.61, 1.00 | 0.79    | 0.60, 1.05 |
| Systolic blood pressure (SBP) † | 1.53                               | 1.30, 1.81 | 1.33    | 1.11, 1.60 | 1.19                            | 0.96, 1.47 | 1.13    | 0.90, 1.44 |
| MetS <sup>†</sup> (yes/no)      | 1.11                               | 0.77, 1.59 | 1.04    | 0.71, 1.53 | 1.73                            | 1.09, 2.74 | 1.77    | 1.11, 2.84 |
| IR score* <sup>†</sup>          | 1.23                               | 1.03, 1.48 | 1.04    | 0.84, 1.27 | 1.24                            | 0.97, 1.58 | 1.23    | 0.94, 1.59 |

OR = odds ratio; CI = confidence interval; HOMA-IR = Homeostatic model assessment, insulin resistance; BMI = body mass index. \*Odds ratios are for each 1 standard deviation increase; Model 1 = unadjusted; Model 2 = adjusted for age, sex, education, race, center, history of coronary artery disease, history of alcohol use, tobacco use and hypertension

† Model 2 not adjusted for hypertension, as is part of MetS definition

**Supplemental Table VI. Association of obesity and insulin resistance and incident lacunes, by size, excluding diabetics (n=861)**

|                                            | Incident lacunes 3-7mm (n=75) |            |         |            | Incident lacunes >7-20mm (n=43) |            |         |            |
|--------------------------------------------|-------------------------------|------------|---------|------------|---------------------------------|------------|---------|------------|
|                                            | Model 1                       |            | Model 2 |            | Model 1                         |            | Model 2 |            |
|                                            | OR                            | 95% CI     | OR      | 95% CI     | OR                              | 95% CI     | OR      | 95% CI     |
| Insulin*                                   | 1.11                          | 0.86, 1.43 | 1.15    | 0.88, 1.51 | 1.17                            | 0.89, 1.53 | 1.18    | 0.85, 1.65 |
| HOMA-IR*,                                  | 1.13                          | 0.85, 1.50 | 1.18    | 0.87, 1.59 | 1.20                            | 0.90, 1.62 | 1.23    | 0.86, 1.80 |
| BMI*                                       | 0.94                          | 0.71, 1.25 | 0.98    | 0.71, 1.34 | 1.15                            | 0.84, 1.59 | 1.11    | 0.77, 1.60 |
| Waist circumference*                       | 1.04                          | 0.79, 1.37 | 1.03    | 0.77, 1.38 | 1.34                            | 0.98, 1.84 | 1.26    | 0.89, 1.77 |
| Waist-to-hip ratio (WTHR)*                 | 1.27                          | 0.96, 1.69 | 1.26    | 0.93, 1.72 | 1.48                            | 1.05, 2.09 | 1.35    | 0.92, 1.98 |
| Triglycerides*                             | 1.31                          | 1.08, 1.58 | 1.28    | 1.04, 1.56 | 1.21                            | 0.97, 1.51 | 1.20    | 0.94, 1.52 |
| High density lipoprotein (HDL)*            | 0.78                          | 0.58, 1.06 | 0.74    | 0.53, 1.06 | 0.64                            | 0.43, 0.94 | 0.68    | 0.43, 1.07 |
| Systolic blood pressure (SBP) <sup>†</sup> | 1.14                          | 0.88, 1.49 | 1.19    | 0.90, 1.58 | 1.32                            | 0.98, 1.78 | 1.19    | 0.85, 1.57 |
| MetS <sup>†</sup> (yes/no)                 | 1.71                          | 0.98, 2.98 | 1.74    | 0.99, 3.04 | 2.48                            | 1.27, 4.86 | 2.69    | 1.34, 5.39 |
| IR score* <sup>†</sup>                     | 1.21                          | 0.90, 1.62 | 1.28    | 0.93, 1.76 | 1.43                            | 1.00, 2.06 | 1.38    | 0.93, 2.04 |

OR = odds ratio; CI = confidence interval; HOMA-IR = Homeostatic model assessment, insulin resistance; \*Odds ratios are for each 1 standard deviation increase; Model 1 = unadjusted; Model 2 = adjusted for age, sex, education, race, center, history of coronary artery disease, history of alcohol use, tobacco use and hypertension † Model 2 not adjusted for hypertension

**Supplemental Table VII. Standard deviation of obesity and insulin resistance components**

|                          | Standard Deviation     |
|--------------------------|------------------------|
| Insulin                  | 9.65 uU/mL             |
| HOMA-IR                  | 3.09                   |
| Body Mass Index          | 4.59 kg/m <sup>2</sup> |
| Waist circumference      | 11.7cm                 |
| Waist-to-hip ratio       | 0.07                   |
| Triglycerides            | 0.90 mmol/l            |
| High density lipoprotein | 17.9 mg/dl             |
| Systolic blood pressure  | 17.5 mmHg              |
| IR-score                 | 2.0                    |
